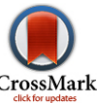

## Correction

# Correction: Correction: Shared air: A renewed focus on ventilation for the prevention of tuberculosis transmission

The *PLOS ONE* Staff

There is an error in the Correction published on August 19, 2014. The affiliation for Samuel Ginsberg is incorrect. Samuel Ginsberg is not affiliated with #3, please refer to his correct affiliation here: Department of Electrical Engineering, University of Cape Town.

## Reference

1. Richardson ET, Morrow CD, Kalil DB, Bekker L-G, Wood R (2014) Shared Air: A Renewed Focus on Ventilation for the Prevention of Tuberculosis Transmission. *PLoS ONE* 9(5): e96334. doi:10.1371/journal.pone.0096334
2. The PLOS ONE Staff (2014) Correction: Shared air: A renewed focus on ventilation for the prevention of tuberculosis transmission. *PLoS ONE* 9(8): e106216. doi:10.1371/journal.pone.0106216

**Citation:** The *PLOS ONE* Staff (2014) Correction: Correction: Shared air: A renewed focus on ventilation for the prevention of tuberculosis transmission. *PLoS ONE* 9(9): e110017. doi:10.1371/journal.pone.0110017

**Published:** September 30, 2014

**Copyright:** © 2014 The *PLOS ONE* Staff. This is an open-access article distributed under the terms of the Creative Commons Attribution License, which permits unrestricted use, distribution, and reproduction in any medium, provided the original author and source are credited.
